# Supplementary material for: Two forms of asynchronous release with distinctive spatiotemporal dynamics in central synapses
Source: eLife. 2023 May 11;12:e84041. doi: 10.7554/eLife.84041 (PMC10174687; doi:10.7554/eLife.84041)
Supplement: Supplementary file 1. [file elife-84041-supp1.xlsx]

## Sheet: Sheet2
Supplementary File 1. Statistical data for all figures
Figure 1	Condition	mean ± SEM	Number of AZ or Events	Number of coverslips	Number of independent cultures	Stastical test	P value
Figure 1C	distance to the AZ center, synchronous	140.01 ± 0.898 nm	6938	21	8	Two-sample Kolmogorov-Smirnov	< 0.0001
	distance to the AZ center, asynchronous	149.25 ± 1.38 nm	3891	21	8
Figure 1F	norm. distance to the AZ center, asynchronous	0.811± 0.013	1089	21	8	Two-sample Kolmogorov-Smirnov	< 0.0001
	norm. distance to the AZ center, simulated asynchronous	1.28 ± 8.76E-3	10890	-	-
Figure 1G	distance to the AZ center, synchronous inside AZ	148.76 ± 1.75 nm	1956	21	8	Two-sample Kolmogorov-Smirnov	< 0.0001
	distance to the AZ center, asynchronous inside AZ	117.84 ± 2.25 nm	799	21	8
Figure 1I	distance to the AZ center, synchronous	121.68 ± 1.66 nm	2169	18	4	Two-sample Kolmogorov-Smirnov
	distance to the AZ center, asynchronous (25 < t < 50 ms) inside AZ	94.51 ± 5.61 nm	634	18	4		< 0.0001
	distance to the AZ center, asynchronous (50 < t < 75 ms) inside AZ	94.01 ± 4.61 nm	878	18	4		< 0.0001
	distance to the AZ center, asynchronous (75 < t < 100 ms) inside AZ	104.38 ± 5.99 nm	843	18	4		< 0.001
Figure 2	Condition	mean ± SEM	Number of AZ or Events	Number of coverslips	Number of independent cultures	Stastical test	P value
Figure 2D	distance to the AZ center, synchronous	115.76 ± 1.93 nm	1610	10	3	Two-sample Kolmogorov-Smirnov	< 0.0001
	distance to the AZ center, asynchronous inside AZ	101.13 ± 2.85 nm	696	10	3
Figure 3	Condition	mean ± SEM	Number of AZ or Events	Number of coverslips	Number of independent cultures	Stastical test	P value
Figure 3C	distance to the AZ center, asynchronous inside cluster	113.32 ± 4.74 nm	203	21	8	Two-sample Kolmogorov-Smirnov	0.053
	distance to the AZ center, asynchronous outside cluster	119.38 ± 2.55 nm	596	21	8
Figure 4	Condition	mean ± SEM	Number of AZ or Events	Number of coverslips	Number of independent cultures	Stastical test	P value
Figure 4A	time from previous synchronous release, asynchronous inside AZ	8.37 ± 0.299 s	799	21	8	Two-sample Kolmogorov-Smirnov	0.0017
	time from previous synchronous release, asynchronous outside AZ	9.47 ± 0.479 s	290	21	8
Figure 4B	time to the next synchronous release, asynchronous inside AZ	7.70 ± 0.267 s	799	21	8	Two-sample Kolmogorov-Smirnov	< 0.0001
	time to the next synchronous release, asynchronous outside AZ	10.61 ± 0.564 s	290	21	8
Figure 4C	time from previous synchronous release, asynchronous inside a cluster	7.81 ± 0.597 s	203	21	8	Two-sample Kolmogorov-Smirnov	0.1863
	time from previous synchronous release, asynchronous outside a cluster	8.57 ± 0.346 s	596	21	8
Figure 4D	time to the next synchronous release, asynchronous inside a cluster	7.04 ± 0.538 s	203	21	8	Two-sample Kolmogorov-Smirnov	0.3098
	time to the next synchronous release, asynchronous outside a cluster	7.92 ± 0.308 s	596	21	8
Figure 5	Condition	mean ± SEM	Number of AZ or Events	Number of coverslips	Number of independent cultures	Stastical test	P value /R2
Figure 5D	ultrafast component's amplitude, synchronous	17.2 ± 0.635 a.u	1703	21	8	Two-sample Kolmogorov-Smirnov	0.0859
	ultrafast component's amplitude, asynchronous	18.4 ± 0.917 a.u	933	21	8
	ultrafast component's tau, synchronous	0.0604 ± 9.92 e-4 s	1703	21	8	Two-sample Kolmogorov-Smirnov	0.9763
	ultrafast component's tau, asynchronous	0.0600 ± 1.34 e-3 s	933	21	8
	fast component's intercept, synchronous	11.2 ± 0.480 a.u	1703	21	8	Two-sample t-test	< 0.0001
	fast component's intercept, asynchronous	6.29 ± 0.684 a.u	933	21	8
	fast component's slope, synchronous	11.5 ± 0.652 a.u / s	1703	21	8	Two-sample t-test	0.0278
	fast component's slope, asynchronous	8.98 ± 1.00 a.u / s	933	21	8
Figure 5H	ultrafast component's amplitude vs distance to the AZ center, synchronous	-	7 bins, 6306 events	21	8	Linear regression	3.69e-05
	ultrafast component's amplitude vs distance to the AZ center, asynchronous	-	7 bins, 3493 events	21	8	Linear regression	0.549
	ultrafast component's tau vs distance to the AZ center, synchronous	-	7 bins, 6306 events	21	8	Linear regression	0.025
	ultrafast component's tau vs distance to the AZ center, asynchronous	-	7 bins, 3493 events	21	8	Linear regression	0.073
	fast component's intercept vs distance to the AZ center, synchronous	-	7 bins, 6306 events	21	8	Linear regression	0.962
	ultrafast component's intercept vs distance to the AZ center, asynchronous	-	7 bins, 3493 events	21	8	Linear regression	0.021
	fast component's slope vs distance to the AZ center, synchronous	-	7 bins, 6306 events	21	8	Linear regression	0.961
	ultrafast component's slope vs distance to the AZ center, asynchronous	-	7 bins, 3493 events	21	8	Linear regression	0.54
Figure 5I	ultrafast component's amplitude vs distance to the AZ center, EGTA synchronous	-	5 bins, 1096 events	11	4	Linear regression	0.019
	ultrafast component's amplitude vs distance to the AZ center, EGTA asynchronous	-	5 bins, 633 events	11	4	Linear regression	0.04
	ultrafast component's tau vs distance to the AZ center, EGTA synchronous	-	5 bins, 1096 events	11	4	Linear regression	0.39
	ultrafast component's tau vs distance to the AZ center, EGTA asynchronous	-	5 bins, 633 events	11	4	Linear regression	0.079
	fast component's intercept vs distance to the AZ center, EGTA synchronous	-	5 bins, 1096 events	11	4	Linear regression	0.675
	ultrafast component's intercept vs distance to the AZ center, EGTA asynchronous	-	5 bins, 633 events	11	4	Linear regression	4.48E -05
	fast component's slope vs distance to the AZ center, EGTA synchronous	-	5 bins, 1096 events	11	4	Linear regression	0.269
	ultrafast component's slope vs distance to the AZ center, EGTA asynchronous	-	5 bins, 633 events	11	4	Linear regression	0.355
Figure 6	Condition	mean ± SEM	Number of AZ or Events	Number of coverslips	Number of independent cultures	Stastical test	P value
Figure 6A	Norm. distance to the AZ center, asynchronous control	0.811 ± 0.0130	1089	21	8	Two-sample Kolmogorov-Smirnov	0.7893
	Norm. distance to the AZ center, asynchronous Sr2+	0.786 ± 0.0261	232	20	5
Figure 6B	distance to the AZ center, synchronous, Sr2+	132.08 ± 4.15 nm	392	20	5	Two-sample Kolmogorov-Smirnov	0.00033244
	distance to the AZ center, asynchronous inside AZ, Sr2+	108.84 ± 4.54 nm	177	20	5
Figure 6C	distance to the AZ center, synchronous inside AZ, control (Ctrl Synch)	148.76 ± 1.76 nm	1956	21	8	Kruskal-Wallis test	< 0.0001
	distance to the AZ center, asynchronous inside AZ, control (Ctrl Asynch)	117.84 ± 2.25 nm	799	21	8
	distance to the AZ center, synchronous inside AZ, Sr2+ (Sr Synch)	132.08 ± 4.15 nm	392	20	5
	distance to the AZ center, asynchronous inside AZ, Sr2+ (Sr Asynch)	108.84 ± 4.54 nm	177	20	5
	Ctrl Synch vs Ctrl Asynch					Dunn's test	< 0.0001
	Ctrl Synch vs Sr Synch						< 0.0001
	Ctrl Synch vs Sr Asynch						< 0.0001
	Ctrl Asynch vs Sr Synch						0.176
	Ctrl Asynch vs Sr Asynch						0.435
	Sr Synch vs Sr Asynch						0.0154
Figure 6D	distance to the closest cluster, asynchronous control	43.69 ± 0.960 nm	799	21	8	Two-sample Kolmogorov-Smirnov	0.0229
	distance to the closest cluster, asynchronous Sr2+	37.74 ± 1.59 nm	177	20	5
Figure 6G	ultrafast component's amplitude, synchronous control (ultrafast amp Synch Ctrl)	0.195 ± 6.71E-3 a.u	1711	21	8	Kruskal-Wallis test	< 0.0001
	ultrafast component's amplitude, asynchronous control (ultrafast amp Asynch Ctrl)	0.211 ± 9.40E-3 a.u	937	21	8
	ultrafast component's amplitude, synchronous Sr2+ (ultrafast amp Synch Sr)	0.1679 ± 7.46E-3 a.u	1370	20	5
	ultrafast component's amplitude, asynchronous Sr2+ (ultrafast amp Asynch Sr)	0.178 ± 9.50E-3 a.u	886	20	5
	ultrafast amp Synch Ctrl vs ultrafast amp Asynch Ctrl					Dunn's test	0.416
	ultrafast amp Synch Ctrl vs ultrafast amp Synch Sr						0.0175
	ultrafast amp Synch Ctrl vs ultrafast amp Asynch Sr						0.243
	ultrafast amp Asynch Ctrl vs ultrafast amp Synch Sr						0.0001678
	ultrafast amp Asynch Ctrl vs ultrafast amp Asynch Sr						0.00675
	ultrafast amp Synch Sr vs ultrafast amp Asynch Sr						0.993
	ultrafast component's tau , synchronous control (ultrafast tau Synch Ctrl)	62.1 ± 0.960 ms	1711	21	8	Kruskal-Wallis test	< 0.0001
	ultrafast component's tau , asynchronous control (ultrafast tau Asynch Ctrl)	60.1 ± 1.29 ms	937	21	8
	ultrafast component's tau , synchronous Sr2+ (ultrafast tau Synch Sr)	50.6 ± 1.09 ms	1370	20	5
	ultrafast component's tau , asynchronous Sr2+ (ultrafast tau Asynch Sr)	48.5 ± 1.35 ms	886	20	5
	ultrafast tau Synch Ctrl vs ultrafast tau Asynch Ctrl					Dunn's test	0.171
	ultrafast tau Synch Ctrl vs ultrafast tau Synch Sr						< 0.0001
	ultrafast tau Synch Ctrl vs ultrafast tau Asynch Sr						< 0.0001
	ultrafast tau Asynch Ctrl vs ultrafast tau Synch Sr						< 0.0001
	ultrafast tau Asynch Ctrl vs ultrafast tau Asynch Sr						< 0.0001
	ultrafast tau Synch Sr vs ultrafast tau Asynch Sr						0.202
	fast component's intercept, synchronous control (fast intrcp Synch Ctrl)	0.120 ± 5.18E-3 a.u	1711	21	8	Kruskal-Wallis test	< 0.0001
	fast component's intercept, asynchronous control (fast intrcp Asynch Ctrl)	0.0659 ± 7.09E-3 a.u	937	21	8
	fast component's intercept, synchronous Sr2+ (fast intrcp Synch Sr)	0.0778 ± 5.40E-3 a.u	1370	20	5
	fast component's intercept, asynchronous Sr2+ (fast intrcp Asynch Sr)	0.0867 ± 6.67 a.u	886	20	5
	fast intrcp Synch Ctrl vs fast intrcp Asynch Ctrl					Dunn's test	< 0.0001
	fast intrcp Synch Ctrl vs fast intrcp Synch Sr						< 0.0001
	fast intrcp Synch Ctrl vs fast intrcp Asynch Sr						0.00116
	fast intrcp Asynch Ctrl vs fast intrcp Synch Sr						0.781
	fast intrcp Asynch Ctrl vs fast intrcp Asynch Sr						0.219
	fast intrcp Synch Sr vs fast intrcp Asynch Sr						0.885
	fast component's slope, synchronous control (fast slope Synch Ctrl)	0.122 ± 7.04E-3 a.u / s	1711	21	8	Kruskal-Wallis test	< 0.0001
	fast component's slope, asynchronous control (fast slope Asynch Ctrl)	0.0916 ± 1.03E-2 a.u / s	937	21	8
	fast component's slope, synchronous Sr2+ (fast slope Synch Sr)	0.0699 ± 7.51E-3 a.u / s	1370	20	5
	fast component's slope, asynchronous Sr2+ (fast slope Asynch Sr)	0.0840 ± 1.01E-2 a.u / s	886	20	5
	fast slope Synch Ctrl vs fast slope Asynch Ctrl					Dunn's test	0.0249
	fast slope Synch Ctrl vs fast slope Synch Sr						< 0.0001
	fast slope Synch Ctrl vs fast slope Asynch Sr						0.00556
	fast slope Asynch Ctrl vs fast slope Synch Sr						0.732
	fast slope Asynch Ctrl vs fast slope Asynch Sr						0.998
	fast slope Synch Sr vs fast slope Asynch Sr						0.966
Figure 5-figure supplement 1	Condition	mean ± SEM	Number of AZ or Events	Number of coverslips	Number of independent cultures	Stastical test	P value
C	ultrafast component's amplitude, asynchronous inside AZ	17.10 ± 1.07 a.u	682	21	8	Two-sample Kolmogorov-Smirnov	0.3358
	ultrafast component's amplitude, asynchronous outside AZ	20.13 ± 1.77 a.u	253	21	8
	ultrafast component's tau, asynchronous inside AZ	0.0595 ± 1.57E-3 s	682	21	8	Two-sample Kolmogorov-Smirnov	0.8529
	ultrafast component's tau, asynchronous outside AZ	0.0612 ± 2.56E-3 s	253	21	8
	fast component's intercept, asynchronous inside AZ	6.57 ± 0.780 a.u	682	21	8	Two-sample Kolmogorov-Smirnov	0.2008
	fast component's intercept, asynchronous outside AZ	5.18 ± 1.40 a.u	253	21	8
	fast component's slope, asynchronous inside AZ	8.47 ± 1.17 a.u / s	682	21	8	Two-sample Kolmogorov-Smirnov	0.2881
	fast component's slope, asynchronous outside AZ	9.91 ± 1.93 a.u / s	253	21	8
D	total fluorescence amplitude vs distance to the AZ center, synchronous events	-	1703	21	8	linear correlation	0.015
	total fluorescence amplitude vs distance to the AZ center, asynchronous events	-	933	21	8	linear correlation	0.92
E	total fluorescence amplitude vs distance to the AZ center, EGTA synchronous events	-	1113	11	3	linear correlation	0.18
	total fluorescence amplitude vs distance to the AZ center, EGTA asynchronous events	-	648	11	3	linear correlation	0.25
F	amplitude spectrum at 0 Hz of synchronous events at 0-100 nm from the AZ center	11.6 ± 0.468	466	21	8	Two-sample Kolmogorov-Smirnov	0.0058
	amplitude spectrum at 0 Hz of synchronous events at 300-400 nm from the AZ center	14.5 ± 1.20	97	21	8
	amplitude spectrum at 1.11 Hz of synchronous events at 0-100 nm from the AZ center	9.81 ± 0.308	466	21	8	Two-sample Kolmogorov-Smirnov	0.0021
	amplitude spectrum at 1.11 Hz of synchronous events at 300-400 nm from the AZ center	12.4 ± 1.20	97	21	8
	amplitude spectrum at 2.22 Hz of synchronous events at 0-100 nm from the AZ center	8.73 ± 0.308	97	21	8	Two-sample Kolmogorov-Smirnov	0.0784
	amplitude spectrum at 2.22 Hz of synchronous events at 300-400 nm from the AZ center	9.65 ± 0.761	466	21	8
	amplitude spectrum at 3.33 Hz of synchronous events at 0-100 nm from the AZ center	7.80 ± 0.236	466	21	8	Two-sample Kolmogorov-Smirnov	0.0015
	amplitude spectrum at 3.33 Hz of synchronous events at 300-400 nm from the AZ center	9.41 ± 0.544	97	21	8
	amplitude spectrum at 4.44 Hz of synchronous events at 0-100 nm from the AZ center	7.21 ± 0.215	466	21	8	Two-sample Kolmogorov-Smirnov	0.0345
	amplitude spectrum at 4.44 Hz of synchronous events at 300-400 nm from the AZ center	9.24 ± 0.591	97	21	8
	amplitude spectrum at 5.55 Hz of synchronous events at 0-100 nm from the AZ center	7.21 ± 0.203	466	21	8	Two-sample Kolmogorov-Smirnov	0.0636
	amplitude spectrum at 5.55 Hz of synchronous events at 300-400 nm from the AZ center	8.37 ± 0.509	97	21	8
G	amplitude spectrum at 0 Hz of asynchronous events at 0-100 nm from the AZ center	10.3 ± 0.499	292	21	8	Two-sample Kolmogorov-Smirnov	0.802
	amplitude spectrum at 0 Hz of asynchronous events at 300-400 nm from the AZ center	10.5 ± 1.36	48	21	8
	amplitude spectrum at 1.11 Hz of asynchronous events at 0-100 nm from the AZ center	10.7 ± 0.390	292	21	8	Two-sample Kolmogorov-Smirnov	0.998
	amplitude spectrum at 1.11 Hz of asynchronous events at 300-400 nm from the AZ center	10.6 ± 0.957	48	21	8
	amplitude spectrum at 2.22 Hz of asynchronous events at 0-100 nm from the AZ center	8.54 ± 0.308	292	21	8	Two-sample Kolmogorov-Smirnov	0.306
	amplitude spectrum at 2.22 Hz of asynchronous events at 300-400 nm from the AZ center	9.51 ± 0.814	48	21	8
	amplitude spectrum at 3.33 Hz of asynchronous events at 0-100 nm from the AZ center	8.57 ± 0.322	292	21	8	Two-sample Kolmogorov-Smirnov	0.883
	amplitude spectrum at 3.33 Hz of asynchronous events at 300-400 nm from the AZ center	8.63 ± 0.840	48	21	8
	amplitude spectrum at 4.44 Hz of asynchronous events at 0-100 nm from the AZ center	7.99 ± 0.278	292	21	8	Two-sample Kolmogorov-Smirnov	0.302
	amplitude spectrum at 4.44 Hz of asynchronous events at 300-400 nm from the AZ center	7.43 ± 0.697	48	21	8
	amplitude spectrum at 5.55 Hz of asynchronous events at 0-100 nm from the AZ center	7.69 ± 0.261	292	21	8	Two-sample Kolmogorov-Smirnov	0.283
	amplitude spectrum at 5.55 Hz of asynchronous events at 300-400 nm from the AZ center	8.89 ± 0.792	48	21	8
H	normalized total fluorescence amplitude, synchronous control	0.305 ± 0.004	1774	21	8	Two-sample Kolmogorov-Smirnov	< 0.0001
	normalized total fluorescence amplitude, asynchronous control	0.2689 ± 0.0055	975	21	8
	normalized total fluorescence amplitude, synchronous Dyngo-4a	0.2251 ± 0.0117	174	6	3	Two-sample Kolmogorov-Smirnov	0.06
	normalized total fluorescence amplitude, asynchronous Dyngo-4a	0.2649 ± 0.0127	151	6	3
Figure 5-figure supplement 3	Condition	mean ± SEM	Number of AZ or Events	Number of coverslips	Number of independent cultures	Stastical test	P value
F	synchronous ultrafast component's tau, room temperature	57.78 ± 0.8319 ms	2628	17	3	Two-sample Kolmogorov-Smirnov	0.0635
	synchronous ultrafast component's tau, 37C (control)	60.3810 ± 0.9918 ms	1774	21	8
Figure 6-figure supplement 1	Condition	mean ± SEM	Number of AZ or Events	Number of coverslips	Number of independent cultures	Stastical test	P value
A	proportion of synchronous events per synapse, control	0.6707 ± 0.0047	944	21	8	Two-sample Kolmogorov-Smirnov	0.0042
	proportion of synchronous events per synapse, Sr2+	0.6389 ± 0.009	239	20	4
B	proportion of asynchronous events inside the AZ per synapse, control	0.1809 ± 0.0042	944	21	8	Two-sample Kolmogorov-Smirnov	0.0276
	proportion of asynchronous events inside AZ per synapse, Sr2+	0.2026 ± 0.0080	239	20	4
C	proportion of asynchronous events outside the AZ per synapse, control	0.1484 ± 0.0039	944	21	8	Two-sample Kolmogorov-Smirnov	0.4129
	proportion of asynchronous events outside AZ per synapse, Sr2+	0.1585 ± 0.0079	239	20	4
